# Supplementary material for: Using a multiomics approach to unravel a septic shock specific signature in skeletal muscle
Source: PubMed Central journal article supplement (PMC9637214; doi:10.1038/s41598-022-23544-8), 2022-11-05
Supplement: 41598_2022_23544_MOESM7_ESM.pdf [file 41598_2022_23544_MOESM7_ESM.pdf]

OXIDATIVE PHOSPHORYLATION

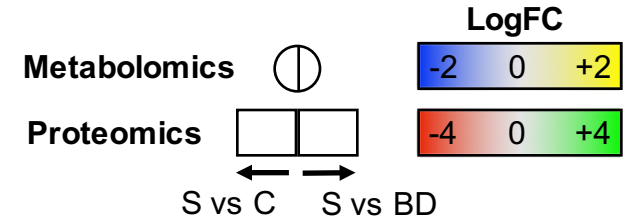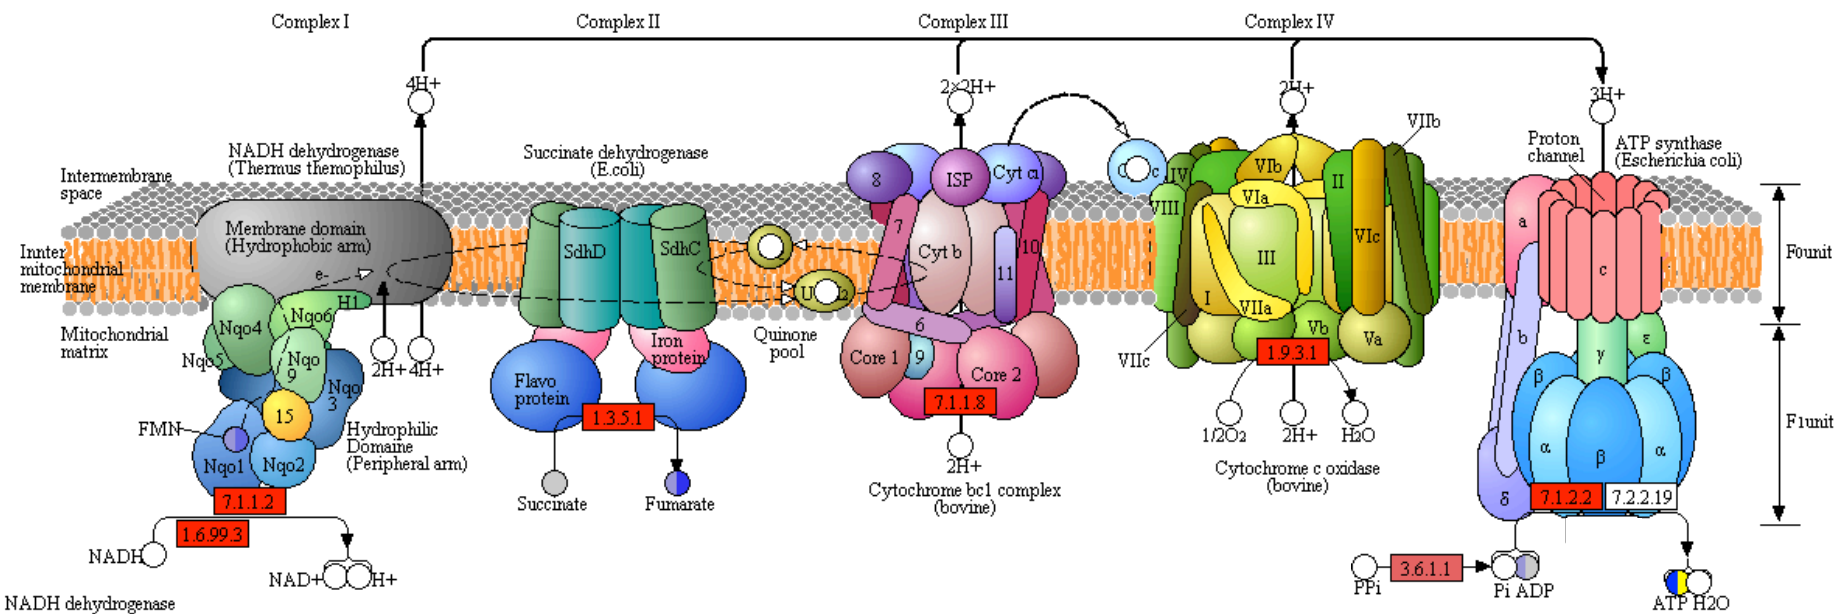

NADH dehydrogenase

|   |     |     |     |     |      |     |     |
|---|-----|-----|-----|-----|------|-----|-----|
| E | ND1 | ND2 | ND3 | ND4 | ND4L | ND5 | ND6 |
|---|-----|-----|-----|-----|------|-----|-----|

|   |        |        |        |        |        |        |        |        |        |        |        |
|---|--------|--------|--------|--------|--------|--------|--------|--------|--------|--------|--------|
| E | Ndufs1 | Ndufs2 | Ndufs3 | Ndufs4 | Ndufs5 | Ndufs6 | Ndufs7 | Ndufs8 | Ndufv1 | Ndufv2 | Ndufv3 |
|---|--------|--------|--------|--------|--------|--------|--------|--------|--------|--------|--------|

|   |        |        |        |        |        |        |        |        |        |         |         |          |          |          |
|---|--------|--------|--------|--------|--------|--------|--------|--------|--------|---------|---------|----------|----------|----------|
| E | Ndufa1 | Ndufa2 | Ndufa3 | Ndufa4 | Ndufa5 | Ndufa6 | Ndufa7 | Ndufa8 | Ndufa9 | Ndufa10 | Ndufab1 | Ndufab11 | Ndufab12 | Ndufab13 |
|---|--------|--------|--------|--------|--------|--------|--------|--------|--------|---------|---------|----------|----------|----------|

|   |        |        |        |        |        |        |        |        |        |         |         |        |        |
|---|--------|--------|--------|--------|--------|--------|--------|--------|--------|---------|---------|--------|--------|
| E | Ndufb1 | Ndufb2 | Ndufb3 | Ndufb4 | Ndufb5 | Ndufb6 | Ndufb7 | Ndufb8 | Ndufb9 | Ndufb10 | Ndufb11 | Ndufc1 | Ndufc2 |
|---|--------|--------|--------|--------|--------|--------|--------|--------|--------|---------|---------|--------|--------|

Succinate dehydrogenase / Fumarate reductase

|   |      |      |      |      |
|---|------|------|------|------|
| E | SDHC | SDHD | SDHA | SDHB |
|---|------|------|------|------|

Cytochrome c reductase

|       |      |       |       |      |      |      |       |
|-------|------|-------|-------|------|------|------|-------|
| E/B/A | ISP  | Cyt b | Cyt 1 |      |      |      |       |
| E     | COR1 | QCR2  | QCR6  | QCR7 | QCR8 | QCR9 | QCR10 |

Cytochrome c oxidase

|   |       |      |      |      |      |       |       |       |       |       |       |       |       |      |       |       |       |       |
|---|-------|------|------|------|------|-------|-------|-------|-------|-------|-------|-------|-------|------|-------|-------|-------|-------|
| E | COX10 | COX3 | COX1 | COX2 | COX4 | COX5A | COX5B | COX6A | COX6B | COX6C | COX7A | COX7B | COX7C | COX8 | E/B/A | COX11 | COX15 | COX17 |
|---|-------|------|------|------|------|-------|-------|-------|-------|-------|-------|-------|-------|------|-------|-------|-------|-------|

F-type ATPase (Eukaryotes)

|       |      |       |       |         |   |
|-------|------|-------|-------|---------|---|
| alpha | beta | gamma | delta | epsilon |   |
| OSCP  | a    | b     | c     | d       | e |
| f     | g    | f8/h  |       | 8       |   |

V-type ATPase (Eukaryotes)

|   |   |   |   |    |   |   |   |
|---|---|---|---|----|---|---|---|
| A | B | C | D | E  | F | G | H |
| a | c | d | e | S1 |   |   |   |
