# Supplementary material for: Using a multiomics approach to unravel a septic shock specific signature in skeletal muscle
Source: PubMed Central journal article supplement (PMC9637214; doi:10.1038/s41598-022-23544-8), 2022-11-05

FATTY ACID DEGRADATION

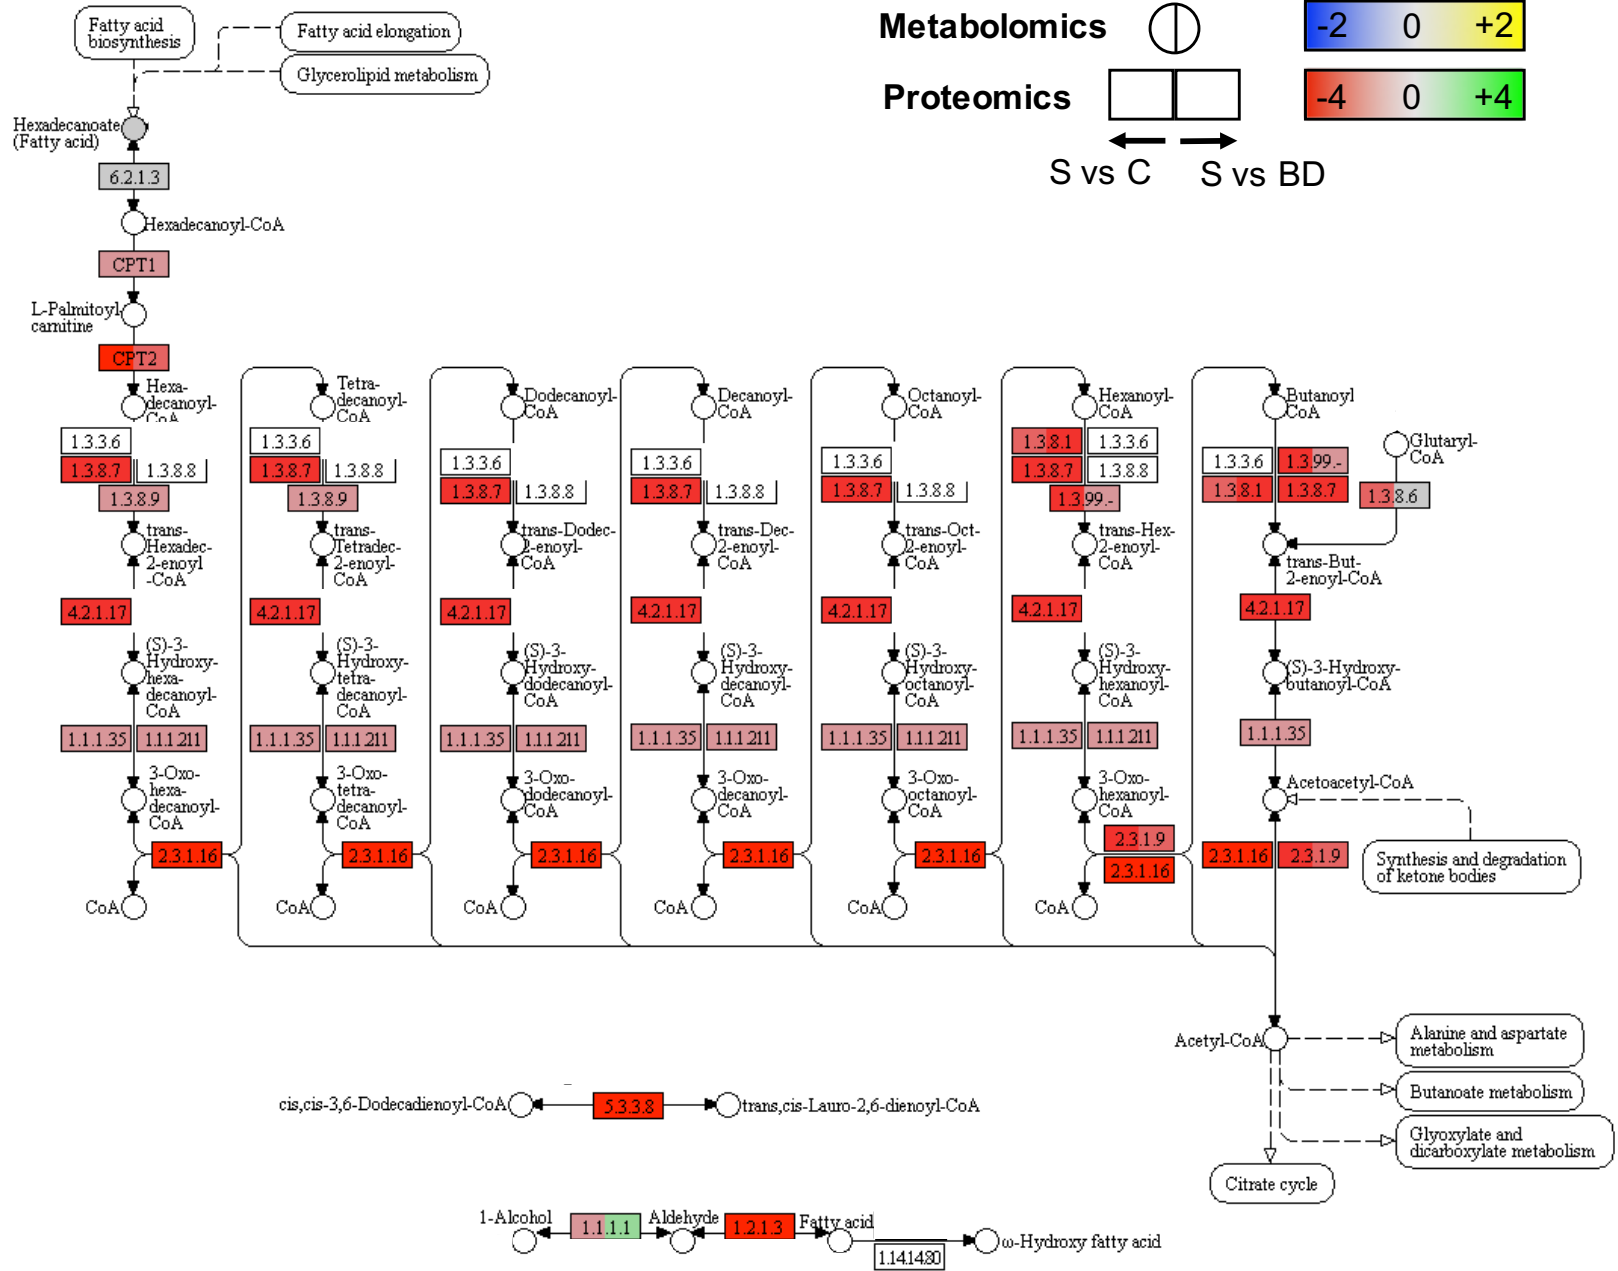

Supplement: 41598_2022_23544_MOESM12_ESM.pdf [file 41598_2022_23544_MOESM12_ESM.pdf]
